# Supplementary material
Source: PubMed Central journal article supplement (PMC4027608)
Supplement: ml400338f_si_001.pdf [file ml400338f_si_001.pdf]

# Supporting information

## Qualification of LSP1-2111 as a Brain Penetrant Group III Metabotropic Glutamate Receptor Orthosteric Agonist

Manuel Cajina<sup>1</sup>, Megan Nattini<sup>1</sup>, Dekun Song<sup>1</sup>, Gennady Smagin<sup>1</sup>, Erling B. Jørgensen<sup>2</sup>, Gamini Chandrasena<sup>1</sup>, Christoffer Bundgaard<sup>2</sup>, Dorthe Bach Toft<sup>2</sup>, Xinyan Huang<sup>1</sup>, Francine Acher<sup>3</sup> and Dario Doller<sup>1,\*</sup>

### 1. Synthesis and characterization of LSP1-2111

LSP1-2111 was synthesized according to Scheme S1, as reported in Selvam C. *et al.* (*J. Med. Chem.* **2010**, *53*, 2797-813):

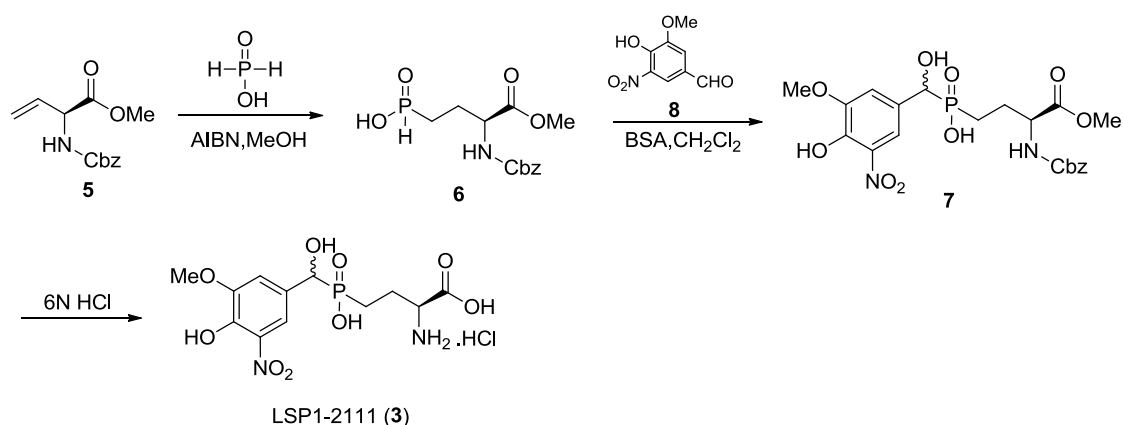

### Scheme S1. Synthetic sequence for the preparation of LSP1-2111.

Step 1. Procedure for the preparation of (S)-3-(((benzyloxy)carbonyl)amino)-4-methoxy-4-oxobutyl)phosphinic acid (6).

To a solution of compound 5 (5 g, 20 mmol) and hypophosphorous acid (13.2 g, 100 mmol) in MeOH (50mL) was added  $\alpha,\alpha'$ -azobisisobutyronitrile (AIBN, 162 mg, 1mmol) under N<sub>2</sub> atmosphere. The resulting mixture was heated to 80°C for 6 h. After cooling to room temperature, the solvent was removed. The residue was diluted with water and extracted with EtOAc (3 × 20 mL). The combined organic layers were dried over Na<sub>2</sub>SO<sub>4</sub> and concentrated. The residue was purified by preparative HPLC to give compound 6 (4.0 g, yield: 63.2%). <sup>1</sup>H NMR (CD<sub>3</sub>OD, 400MHz)  $\delta$ 7.25-7.17 (m, 5H), 4.99 (s, 2H), 4.18-4.03 (m, 1H), 3.62 (s, 3H), 2.08-1.95 (m, 1H), 1.84-1.67 (m, 3H).

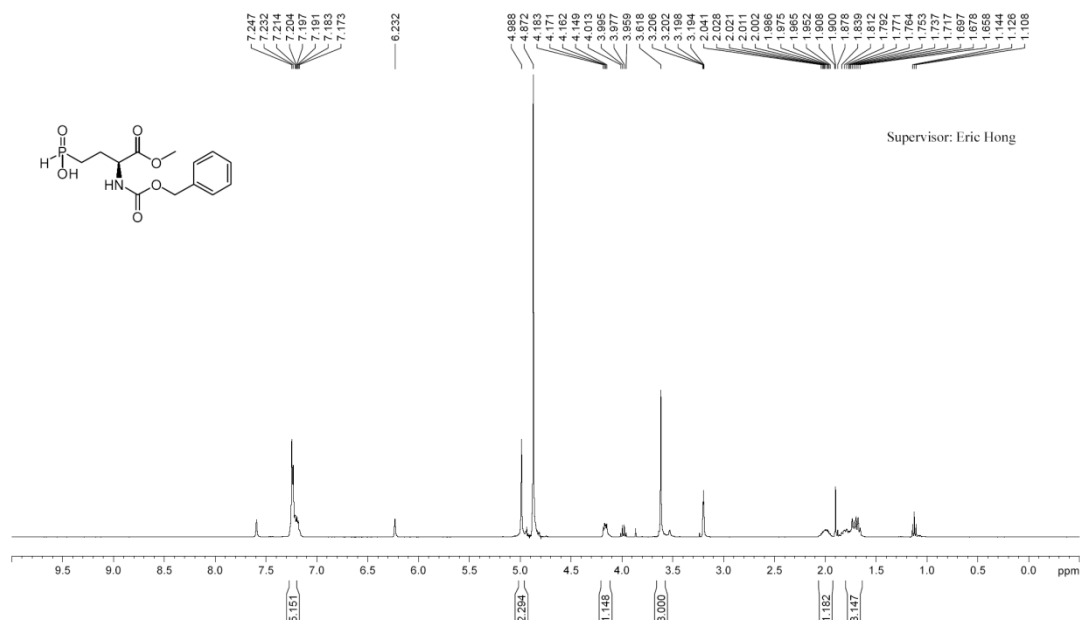

**Chart S1.  $^1\text{H}$  NMR spectrum of compound 6.**

Step 2. Procedure for the preparation of ((*S*)-3-(((benzyloxy)carbonyl)amino)-4-methoxy-4-oxobutyl)(hydroxy(4-hydroxy-3-methoxy-5-nitrophenyl)methyl)phosphinic acid (**7**).

To a mixture of compound **6** (9 g, 28.6 mmol) and compound **8** (16.9 g, 85.7 mmol) in  $\text{CH}_2\text{Cl}_2$  (300 mL) was added dropwise *N,O*-bis(trimethylsilyl)acetamide (51.3 mL, 200.2 mmol) at  $0^\circ\text{C}$  under  $\text{N}_2$  atmosphere. The mixture was warmed to room temperature and stirred overnight. Then, 1*N* HCl (200 mL) was added at  $0^\circ\text{C}$ . The resulting mixture was extracted with EtOAc (50 mL $\times$ 3). The combined organic layers were concentrated and the residue was recrystallized from EtOAc/petroleum ether to give compound **7** (9 g, yield: 61.5%).  $^1\text{H}$  NMR ( $\text{CD}_3\text{OD}$  400MHz)  $\delta$  7.57 (s, 1H), 7.30-7.10 (m, 6H), 4.96 (s, 2H), 4.75-4.70 (m, 1H), 4.19-4.05 (m, 1H), 3.80 (s, 3H), 3.58 (s, 3H), 2.11-1.90 (m, 1H), 1.85-1.65 (m, 3H). The compound was obtained as a 1:1 mixture of diastereoisomer benzylic alcohols.

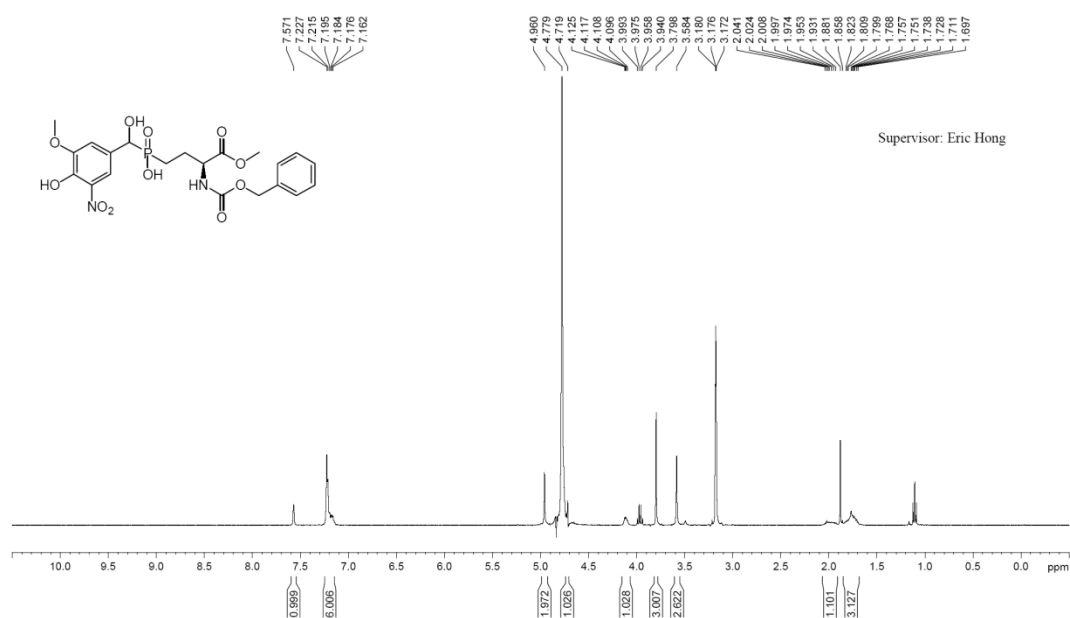

**Chart S2.  $^1\text{H}$  NMR spectrum of compound 7.**

Step 3. Procedure for the preparation of (2*S*)-2-amino-4-(hydroxy(hydroxy(4-hydroxy-3-methoxy-5-nitrophenyl)methyl)phosphoryl)butanoic acid (LSP1-2111, **3**).

A mixture of compound **7** (10 g, 20 mmol) in 6N HCl (50 mL) was heated to 110°C overnight. After cooling to room temperature, the solvent was removed. The residue was purified by preparative HPLC (HCl as buffer) to yield compound **3** (2.74 g, yield: 35.1%). <sup>1</sup>H NMR (DMSO-*d*<sub>6</sub>, 400MHz) δ 8.50 (s, 3H), 7.49 (s, 1H), 7.32 (s, 1H), 4.85 (d, *J* = 8.0 Hz, 1H), 4.09-3.95 (m, 1H), 3.86 (s, 3H), 2.20-1.60 (m, 4H). The compound was obtained as a 1:1 mixture of diastereoisomer benzylic alcohols.

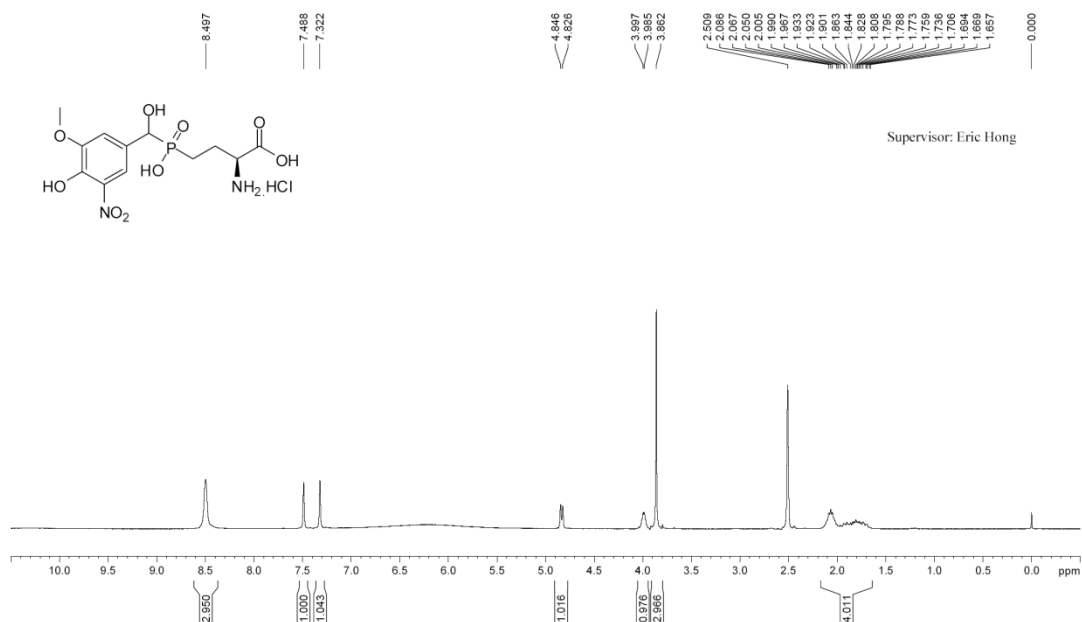

Supervisor: Eric Hong

Chart S3. H-1 NMR spectrum of compound **3**.

HPLC analysis

Instrument: Shimadzu LC-20AB, Column: Atlantis HILIC Silica150\*4.6mm, 5µm, Mobile Phase: 0.1% TFA in water (solvent A) and 0.1% TFA in acetonitrile (solvent B), using the elution gradient 90%-60% (solvent B) over 10 minutes and holding at 60% for 5 minutes at a flow rate of 1.5 ml/minutes; RetentionTime:3.384min; Wavelength:220nm.

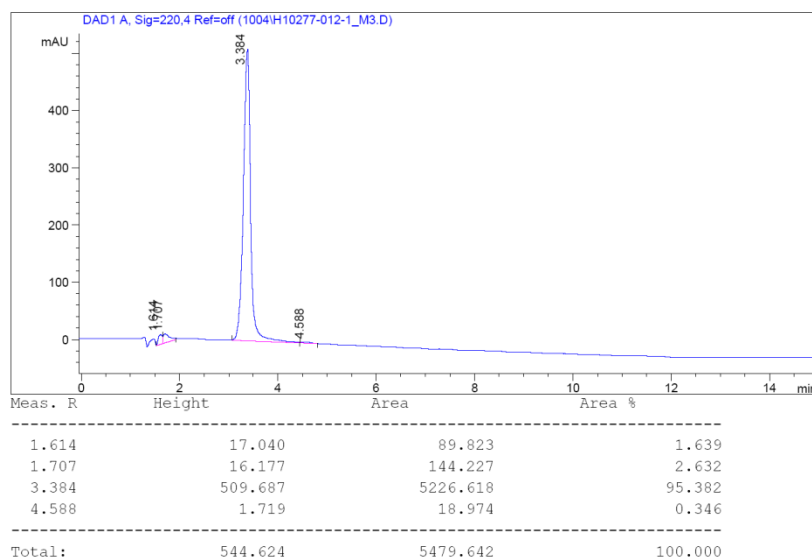

Chart S4. HPLC trace of compound **3**.

## LC-MS analysis

A:Shim-Pack XR-ODS 3.0\*30mm,SN:80531084  
 B:XBrige Shield RP18 2.1\*50mm,SN:01113830313306

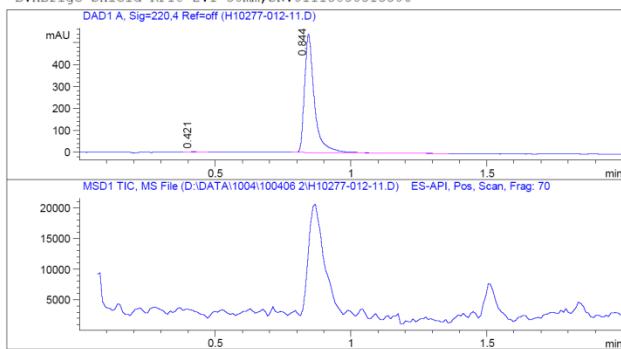

### Report

Signal 1 : DAD1 A, Sig=220,4 Ref=off

| # | Meas. Ret. | Height  | Width | Area     | Area % |
|---|------------|---------|-------|----------|--------|
| 1 | 0.421      | 3.724   | 0.026 | 6.511    | 0.474  |
| 2 | 0.844      | 538.445 | 0.038 | 1367.346 | 99.526 |

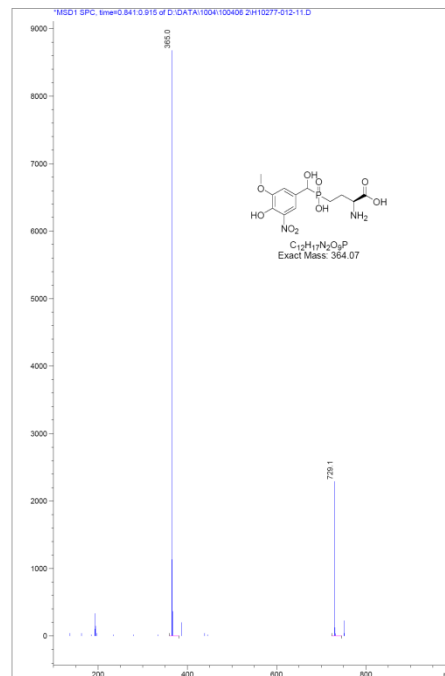

Chart S5. LC trace and mass spectrum obtained during the HPLC analysis of compound 3.

## 2. Time course for brain and plasma exposures of LSP1-2111 administered via IP route in rat

Preliminary studies exploring plasma and brain exposure of LSP1-2111 were conducted using IP administration in order to recapitulate work previously reported in the literature. However, our work (see graph S<sub>1</sub>) indicated that the exposures obtained using the IP route of administration, while roughly equivalent in magnitude and the rate of disappearance, were significantly more variable than what was determined in subsequent studies using the SC route (as shown in manuscript). Thus, for subsequent rat studies exploring CNS disposition of LSP1-2111, the SC route of administration was used.

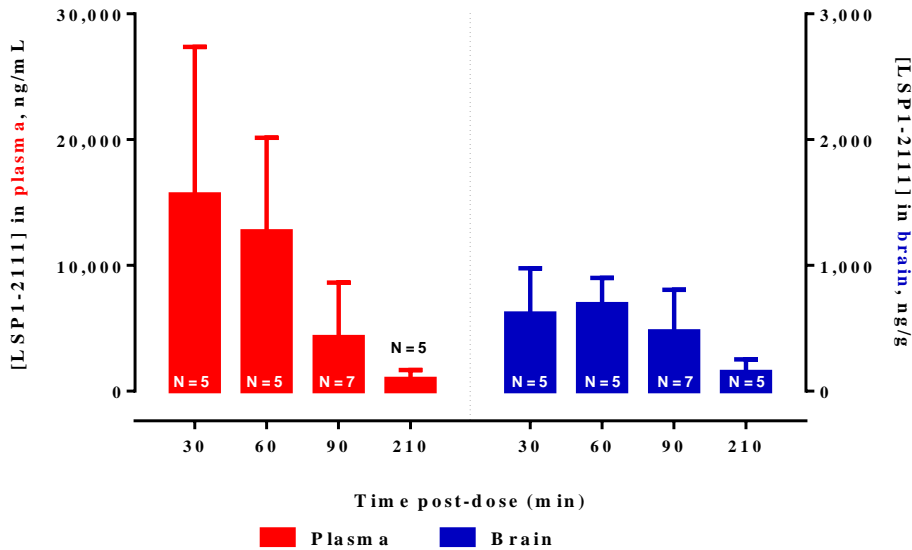

**Figure S<sub>1</sub>.** Time course of plasma and brain exposure profiles of LSP1-2111 (10 mg/kg dose) in rat following IP administration. Magnitude of the error bars (SD) showing a significantly higher variability than the results from SC administration studies shown in the manuscript.

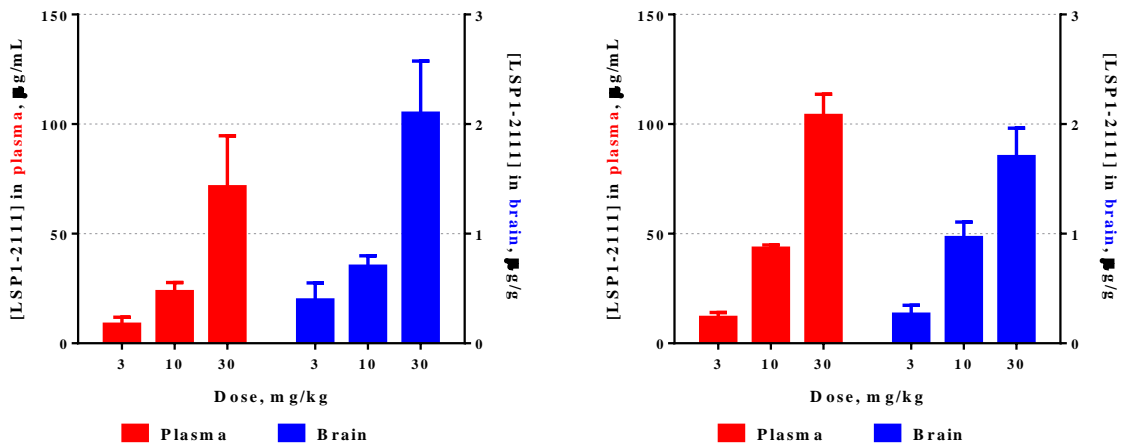

**Figure S<sub>2</sub>.** Plasma and brain exposures at 10 min (left) and 20 min (right) post-dosing of LSP1-2111 in rat following IP administration at 3, 10 and 30 mg/kg doses (N=4 in each group).

### 3. Tables with figures corresponding to microdialysis studies

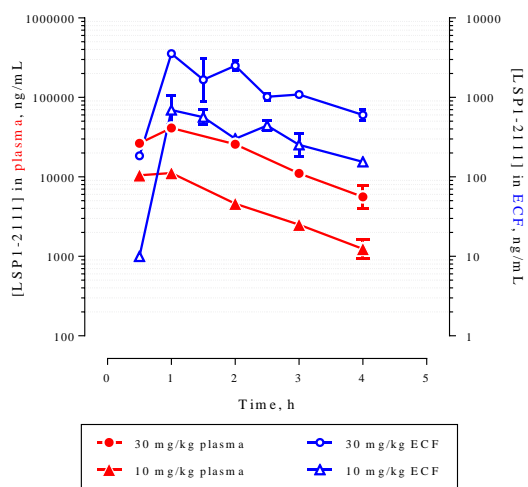

**Figure 1.** Rat plasma and ECF dialysate concentration time profile of LSP1-2111 following subcutaneous (SC) administration at 10 and 30 mg/kg. The ECF concentration values have been corrected for recovery loss based on the 96% *in vivo* probe recovery under the same flow rate.<sup>23</sup>

**Table S1.** Plasma and ECF concentrations in the microdialysis studies corresponding to Figure 1.

| Time (h) | Dose           |             |                |             |
|----------|----------------|-------------|----------------|-------------|
|          | 10 mg/kg       |             | 30 mg/kg       |             |
|          | Plasma (µg/mL) | ECF (µg/mL) | Plasma (µg/mL) | ECF (µg/mL) |
| 0.5      | 10.5           | 0.01        | 26.5           | 0.18        |
| 1        | 11.2           | 0.70        | 41.4           | 3.5         |
| 1.5      | ---            | 0.56        | ---            | 1.7         |
| 2        | 4.6            | 0.30        | 25.7           | 2.5         |
| 2.5      | ---            | 0.44        | ---            | 1.0         |
| 3        | 2.5            | 0.25        | 11.1           | 1.1         |
| 4        | 1.2            | 0.16        | 5.6            | 0.6         |

### 4. Numeric data for Figure 2

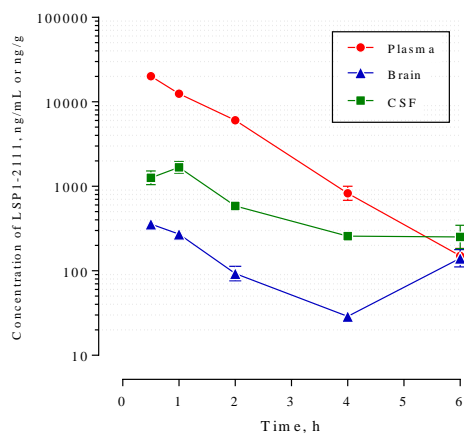

**Figure 2.** Plasma, brain and CSF concentration time profile study of LSP1-2111 upon subcutaneous (SC) administration at 10 mg/kg. Standard error bars larger than marker size are only shown.

**Table S2.** Plasma, brain and CSF concentrations corresponding to Figure 2.

| Time (h) | Plasma (µg/mL) | Brain (µg/g) | CSF (µg/mL) |
|----------|----------------|--------------|-------------|
| 0.5      | 20.1           | 0.36         | 1.3         |
| 1        | 12.5           | 0.27         | 1.7         |
| 2        | 6.0            | 0.09         | 0.59        |
| 4        | 0.83           | 0.03         | 0.26        |
| 6        | 0.15           | 0.14         | 0.25        |

## 5. Numeric data for Figure 3

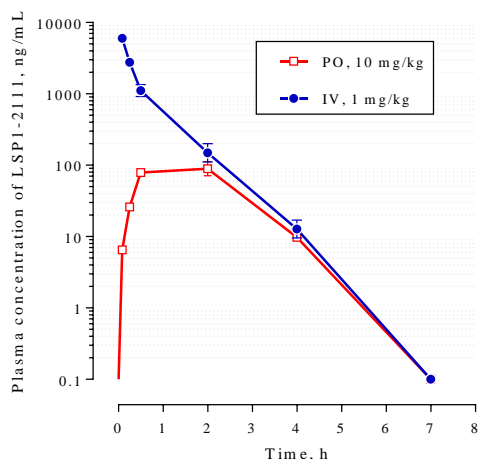

**Figure 3.** Plasma concentration time profile of LSP1-2111 after oral administration in SD rats (N=2). Standard error bars larger than marker size are only shown.

**Table S3.** Plasma concentrations in the pharmacokinetic study shown in Figure 3.

| Time (h) | IV (1 mg/kg)<br>Plasma ( $\mu\text{g/mL}$ ) | PO (10 mg/kg)<br>Plasma (ng/mL) |
|----------|---------------------------------------------|---------------------------------|
| 0.083    | 6.0                                         | 7                               |
| 0.25     | 2.8                                         | 26                              |
| 0.5      | 1.1                                         | 79                              |
| 2        | 0.15                                        | 90                              |
| 4        | 0.013                                       | 10                              |
| 7        | 0.001                                       | 0.1                             |

## 6. Quantitative microdialysis studies

Experiments used male SD rats. Animals were housed in a temperature-controlled vivarium with free access to food and water. All procedures with the animals were approved by the local IACUC. Each animal to be used for microdialysis experiments was placed into a stereotaxic frame and guide cannulas were implanted into the medial prefrontal cortex. Animals were allowed to recover for 5-7 days. On the day of the experiment, MetaQuant (BrainLink, The Netherlands) microdialysis probes (polyarylethersulphone (PAES) membrane, 4 mm length) were inserted through the cannulas, connected to the pump and allowed to stabilize for 2 h. *In vitro* probe recovery for MetaQuant probes for LSP1-2111 was  $96 \pm 4.0\%$ . The dialysis probes were perfused with 0.2% (w/v) bovine serum albumin (BSA) dissolved into a filtered Ringer buffer containing 147 mM NaCl, 3.0 mM KCl, 1.2 mM CaCl<sub>2</sub>, and 1.2 mM MgCl<sub>2</sub>. Ultra-slow dialysis was performed using flow rate of 0.2  $\mu\text{L/min}$ . Dialysate was diluted with the incoming flow of 1.8  $\mu\text{L/min}$ , resulting in total flow rate of 2  $\mu\text{L/min}$ . 30-minute samples were collected for 4 h in chilled glass tubes using refrigerated fraction collector and then analyzed using a quantitative LC/MS/MS method. Ultra-slow dialysis raises the extraction efficiency of the probe. Ultra-slow perfusion with a flow rate of 0.2  $\mu\text{L/min}$  allows the annulus fluid to approach the equilibration with the adjacent tissue at the outflow and result in 100% recovery rate *in vivo*. In our study we achieved 96% *in vivo* recovery and all values were adjusted using this factor. This approach has been widely used in preclinical and clinical applications.

## 7. Bioanalysis of LSP1-2111 in tissue samples

Frozen rat brains were weighed and homogenized in 3 $\times$  (weight/volume) of brain homogenization buffer consisting of 50% water, 30% 2-propanol and 20% DMSO. A 150  $\mu\text{L}$  internal standard solution (Lu AA34745, a compound from an internal project, in 80% and 20% acetonitrile and DMSO respectively) was added to 50  $\mu\text{L}$  homogenized brain/plasma sample. The samples were mixed and centrifuged. The supernatant was injected directly into the Thermo Finnigan Quantum Ultra LC/MS/MS system for analysis. A standard curve (0-4000 ng/mL) was generated in rat brain homogenates to de-

termine the concentrations of LSP1-2111 in the brain. A standard curve (0-1000 ng/mL) was generated in rat plasma to determine the LSP1-2111 concentration in plasma samples (Tables S1 and S2, supplementary material).

#### 8. HPLC and mass spectrometry conditions for the bioanalysis of compound 3 in plasma, brain, CSF and ECF.

**Table S4. HPLC experimental conditions for the analysis of compound 3.**

| HPLC Experimental Conditions |                                       | Step | Time(min) | mL/min | % A | % B |
|------------------------------|---------------------------------------|------|-----------|--------|-----|-----|
| System                       | Spark-Holland HPLC                    | 1    | 00:10     | 0.2    | 95  | 5   |
| Eluting Column               | Atlantis T3 2.1x30mm 3μ (Waters Corp) | 2    | 00:12     | 0.3    | 95  | 5   |
| <b>Pump Conditions</b>       |                                       | 3    | 01:40     | 0.3    | 50  | 50  |
| Injection volume             | 10 μL                                 | 4    | 01:50     | 0.2    | 5   | 95  |
| Mobile Phase A               | 0.1 % formic acid in water            | 5    | 02:00     | 0.2    | 5   | 95  |
| Mobile Phase B               | 0.01% formic acid in acetonitrile     | 6    | 04:00     | 0.2    | 5   | 95  |
|                              |                                       | 7    | 04:10     | 0.5    | 95  | 5   |
|                              |                                       | 8    | 04:35     | 0.5    | 95  | 5   |
|                              |                                       | 9    | 04:55     | 0.3    | 95  | 5   |
|                              |                                       | 10   | 05:00     | 0.2    | 95  | 5   |

**Table S5 Mass spectrometry conditions for the analysis of compound 3.**

| Mass Spectrometer Experimental Conditions |                                            | Compound                                                                                                                | SRM Transition | Tube Lens | Collision Energy |
|-------------------------------------------|--------------------------------------------|-------------------------------------------------------------------------------------------------------------------------|----------------|-----------|------------------|
| System                                    | Thermo Finnigan TSQ Quantum Ultra LC/MS/MS | LSP1-2111                                                                                                               | 365.25 → 56    | 95        | 21               |
| Scan mode                                 | SRM                                        |                                                                                                                         | 365.25 → 122   | 95        | 19               |
| Acquisition type                          | Centroid                                   |                                                                                                                         | 365.25 → 301   | 95        | 19               |
| Ionization mode                           | Heated Electrospray (positive)             |                                                                                                                         | 365.25 → 347   | 95        | 14               |
| <b>Source Conditions</b>                  |                                            | Lu AA34745*                                                                                                             | 552.32 → 203   | 130       | 50               |
| Spray voltage                             | 3000 V                                     | *Lu AA34745 = N-[3-(1-[3-[2,2-bis(4-fluorophenyl)acetyl-amino]propyl](4-piperidyl))-4-fluorophenyl]-2-methylpropanamide |                |           |                  |
| Vaporizer Temperature                     | 300°C                                      |                                                                                                                         |                |           |                  |
| Sheath gas pressure                       | 10                                         |                                                                                                                         |                |           |                  |
| Ion Sweep Gas                             | 0                                          |                                                                                                                         |                |           |                  |
| Aux gas pressure                          | 5                                          |                                                                                                                         |                |           |                  |
| Capillary temperature                     | 325 °C                                     |                                                                                                                         |                |           |                  |
| Collision gas pressure                    | 1.0 mTorr                                  |                                                                                                                         |                |           |                  |
| MS1 Res                                   | 0.70                                       |                                                                                                                         |                |           |                  |
| MS3 Res                                   | 0.70                                       |                                                                                                                         |                |           |                  |



9. Studies reported in the literature using LSP1-2111 in preclinical models.

Table S6. Doses of LSP1-2111 tested in preclinical models (as reported in the referenced literature).

| Reference                   | Species | Dosing conditions*                                | Model                                         |
|-----------------------------|---------|---------------------------------------------------|-----------------------------------------------|
| 3; Beurrier <i>et al.</i>   | Rat     | 1, <b>15</b> and 25 mg/kg, IP                     | Haloperidol-induced catalepsy                 |
| 8; Lopez <i>et al.</i>      | Mouse   | <b>30</b> mg/kg, IP                               | 6-OHDA unilateral lesions (sub-chronic)       |
| 9; Wierońska <i>et al.</i>  | Mouse   | <b>2</b> and <b>5</b> mg/kg, IP                   | Elevated plus-maze test                       |
|                             | Mouse   | 0.75, <b>2</b> and <b>5</b> mg/kg, IP             | Stress-induced hyperthermia                   |
|                             | Mouse   | 1, 2.5, 5 and 10 mg/kg, IP                        | Tail suspension test                          |
|                             | Mouse   | 1 and 5 mg/kg, IP                                 | Forced swim test                              |
| 10; Wierońska <i>et al.</i> | Mouse   | 5 mg/kg, IP                                       | Locomotor activity of habituated mice         |
|                             | Mouse   | 5 mg/kg, IP                                       | Spontaneous locomotor activity                |
|                             | Mouse   | 0.3, <b>1</b> , <b>2</b> , and <b>5</b> mg/kg, IP | MK-801-induced hyperactivity                  |
|                             | Mouse   | 0.3, <b>1</b> , <b>2</b> , and <b>5</b> mg/kg, IP | Amphetamine-induced hyperactivity             |
|                             | Mouse   | 0.3, <b>1</b> , <b>2</b> , and <b>5</b> mg/kg, IP | Head twitch test                              |
| 11; Wierońska <i>et al.</i> | Rat     | 0.5, <b>2</b> , and <b>5</b> mg/kg, IP            | MK-801-induced deficits in social interaction |
|                             | Rat     | 0.5, <b>2</b> , and <b>5</b> mg/kg, IP            | Novel object recognition                      |
|                             | Mouse   | 0.3, <b>5</b> mg/kg, IP                           | MK-801-induced hyperactivity                  |
|                             | Mouse   | 0.3, <b>5</b> mg/kg, IP                           | Amphetamine-induced hyperactivity             |
|                             | Mouse   | 0.3, <b>5</b> mg/kg, IP                           | Head twitch test                              |
| 12; Davis <i>et al.</i>     | Mouse   | <b>2.5</b> , <b>5</b> and 7.5 mg/kg, IP           | Acquisition and extinction of cued fear       |

*\*Doses in red are efficacious in the corresponding tests.*
